# Supplementary material for: Analysis of in situ EXAFS data of supported metal catalysts using the third and fourth cumulant
Source: Royal Society of Chemistry journal article supplement (doi:10.1039/b605248g), 2006-01-01

# Pt/Al<sub>2</sub>O<sub>3</sub>-79a

$k^3$ -weighted Chi-data and  $k^3$ -weighted FT's ( $k = 3 - 13 \text{ \AA}^{-1}$ )

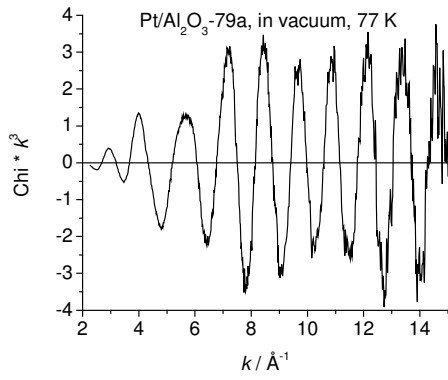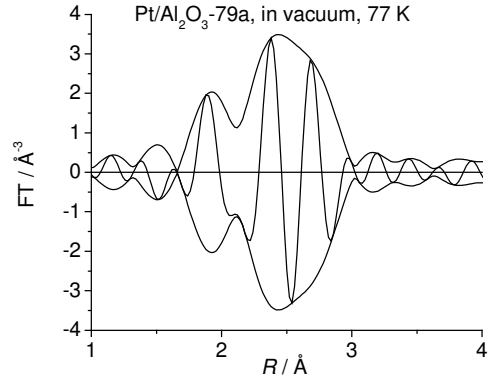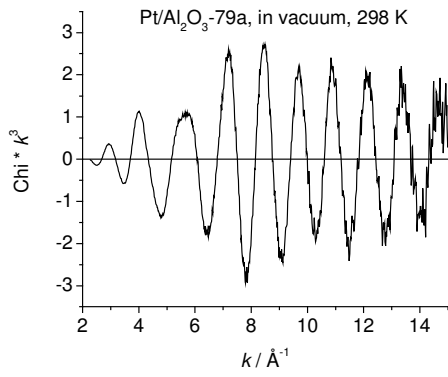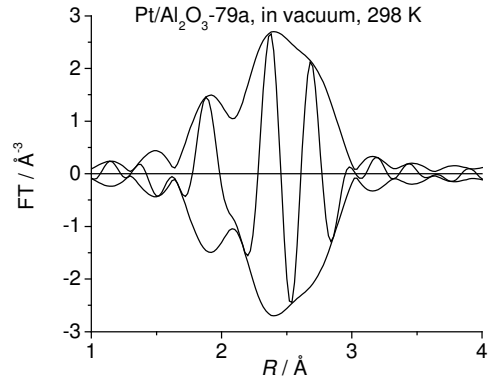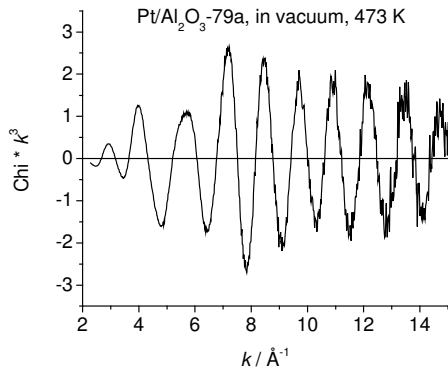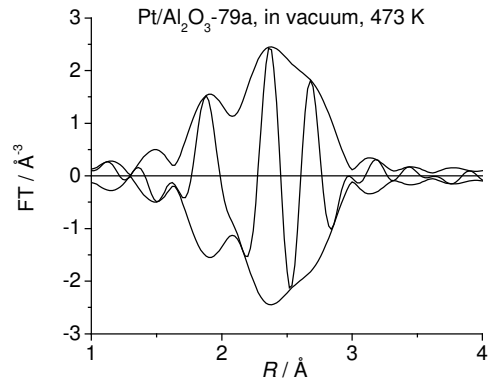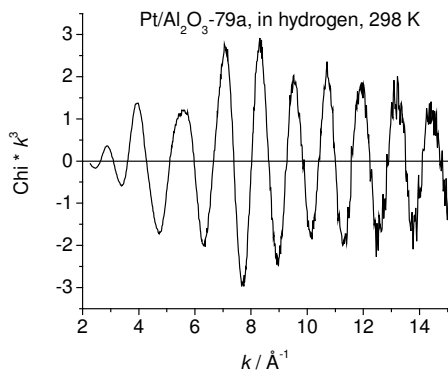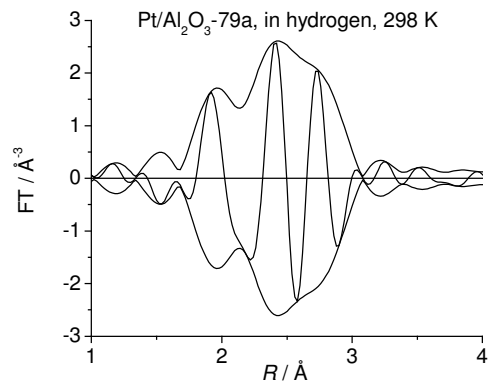

# Pt/Al<sub>2</sub>O<sub>3</sub>-79b

$k^3$ -weighted Chi-data and  $k^3$ -weighted FT's ( $k = 3 - 13 \text{ \AA}^{-1}$ )

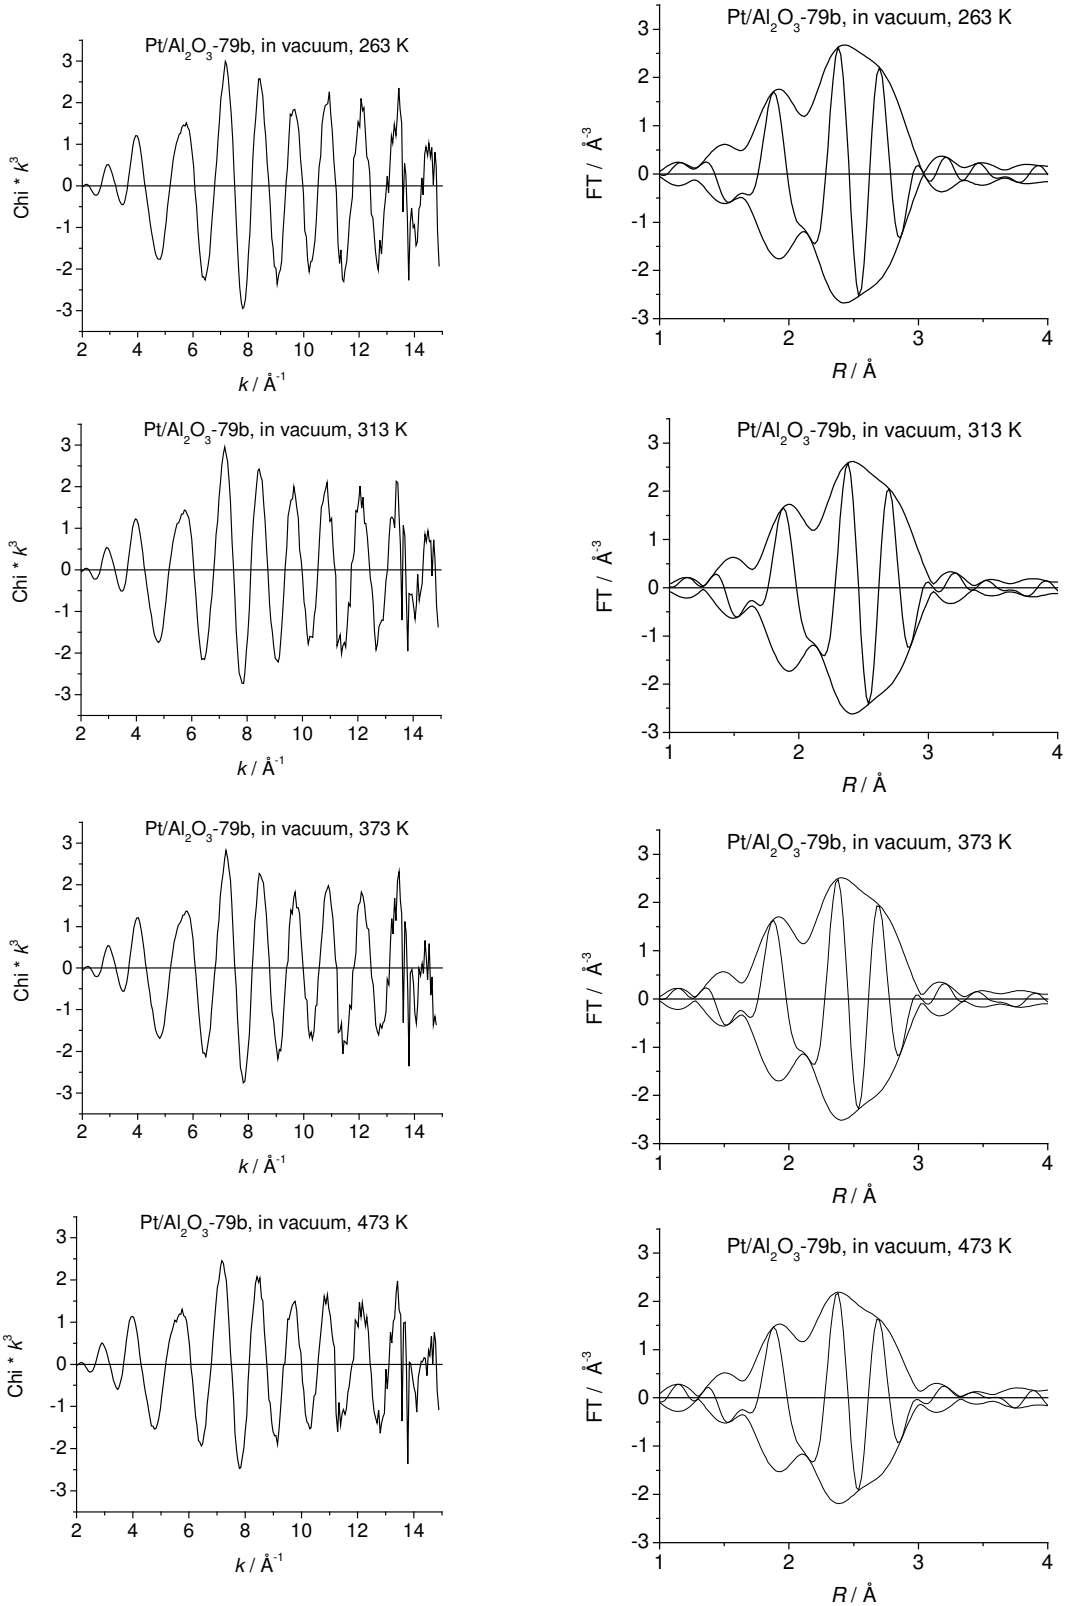

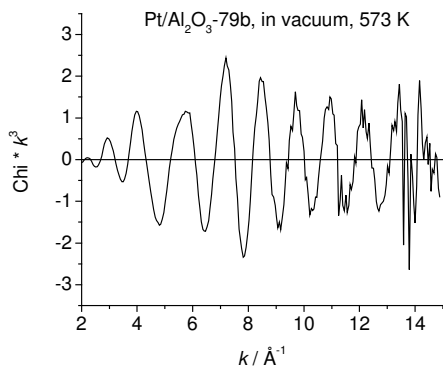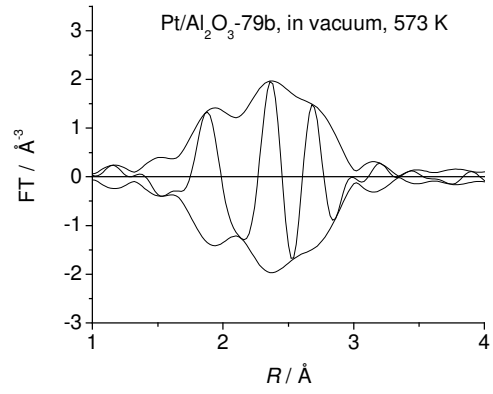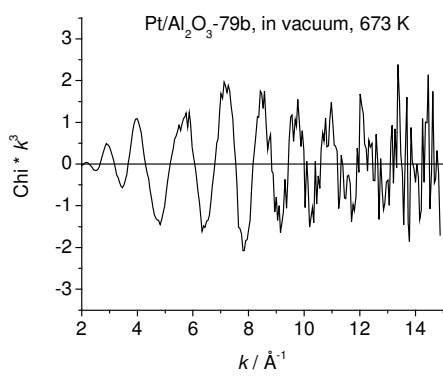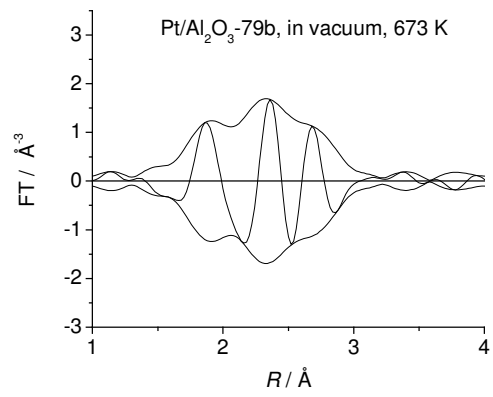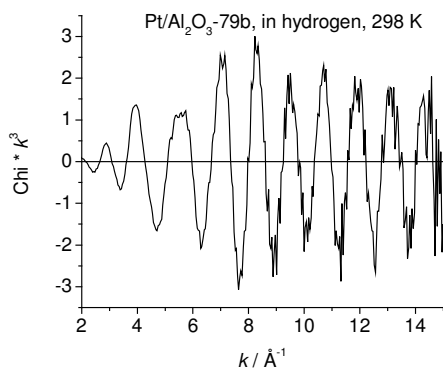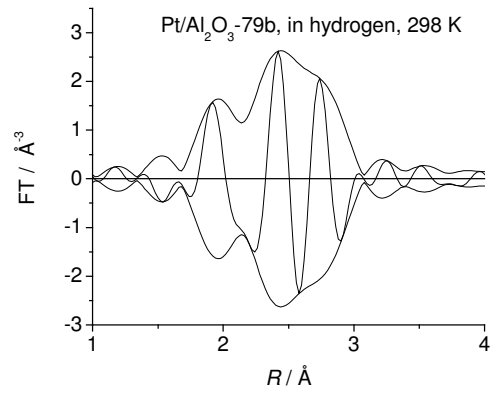

### Pt/SiO<sub>2</sub>-57

$k^3$ -weighted Chi-data and  $k^3$ -weighted FT's ( $k = 3 - 13 \text{ \AA}^{-1}$ )

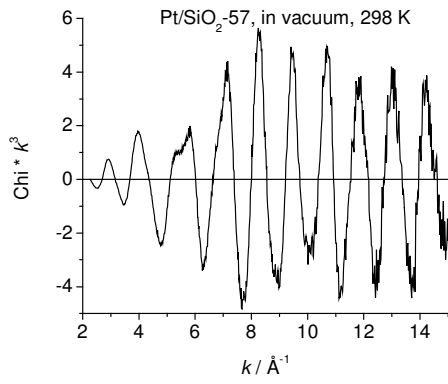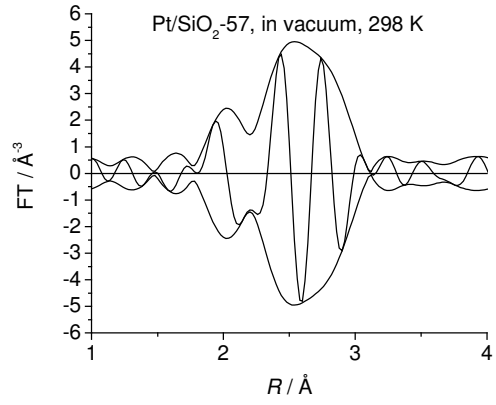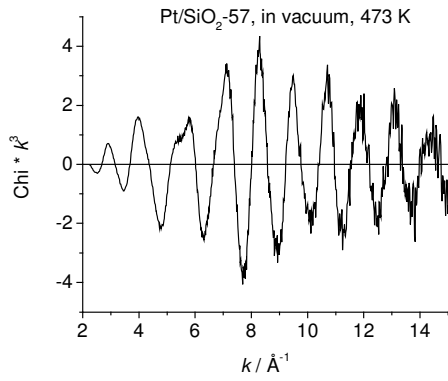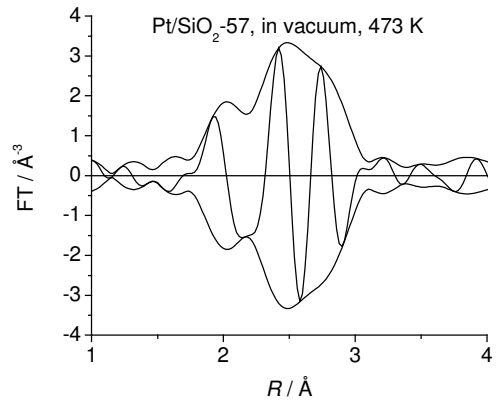

# Pt/K/Al<sub>2</sub>O<sub>3</sub>-81

$k^3$ -weighted Chi-data and  $k^3$ -weighted FT's ( $k = 3 - 12.5 \text{ \AA}^{-1}$ )

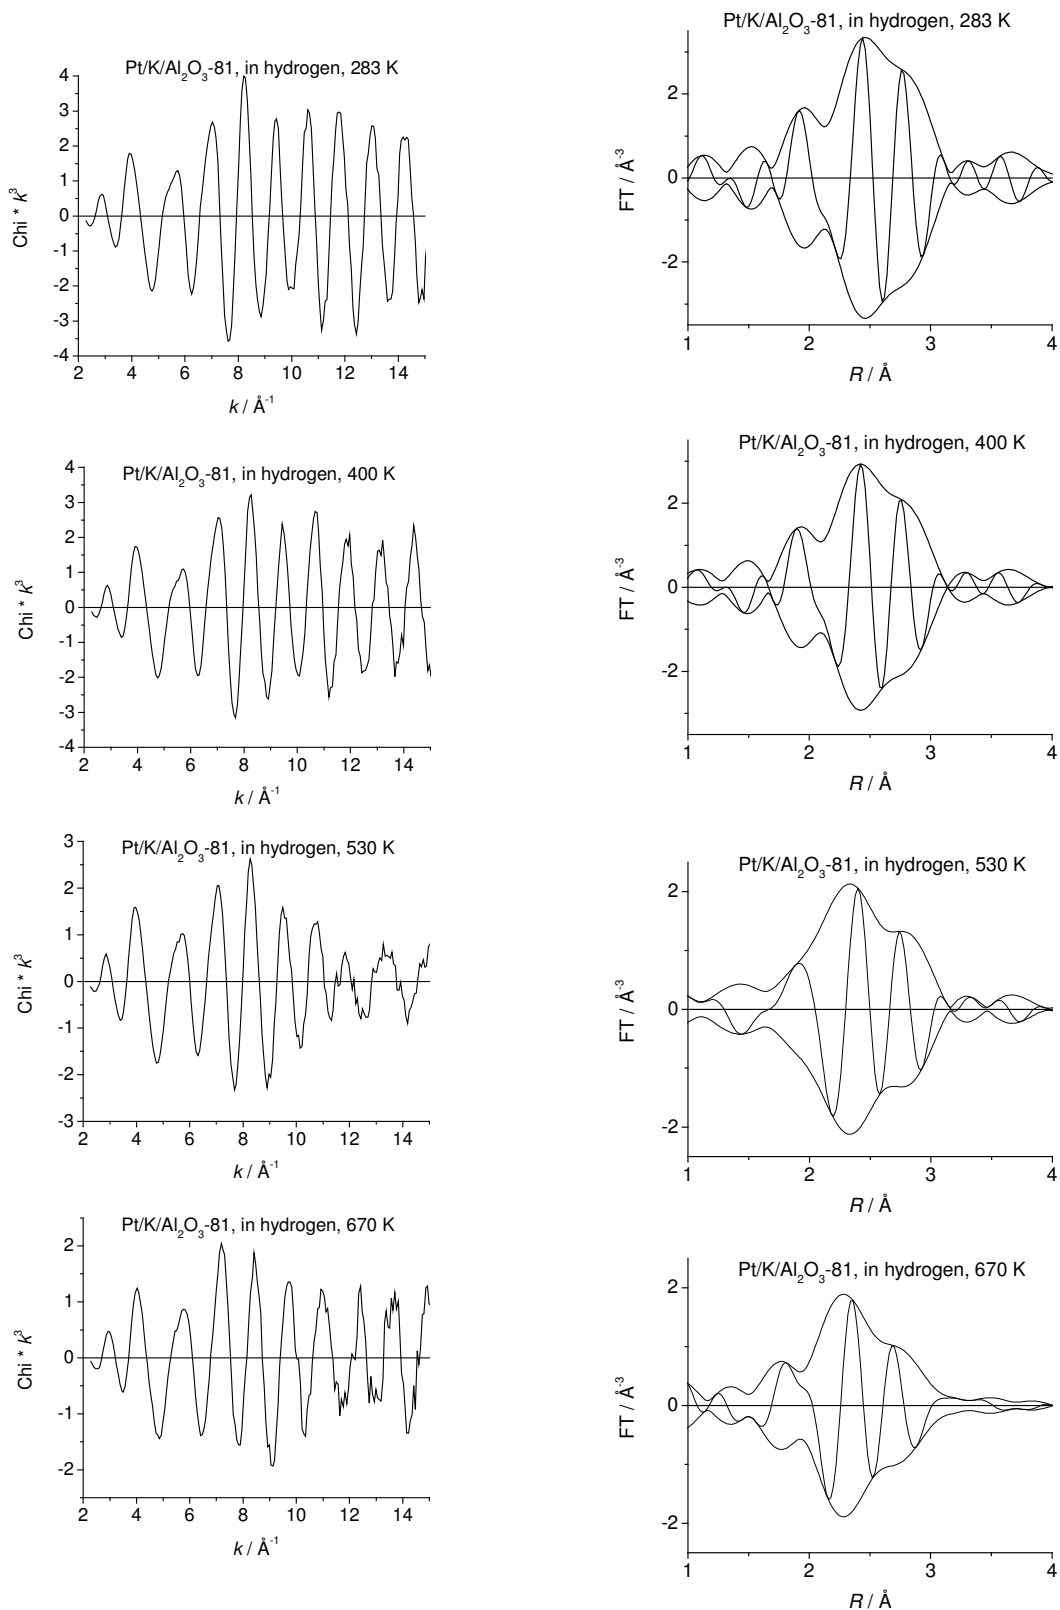

# Pt/Al<sub>2</sub>O<sub>3</sub>-70

$k^3$ -weighted Chi-data and  $k^3$ -weighted FT's ( $k = 3 - 12.5 \text{ \AA}^{-1}$ )

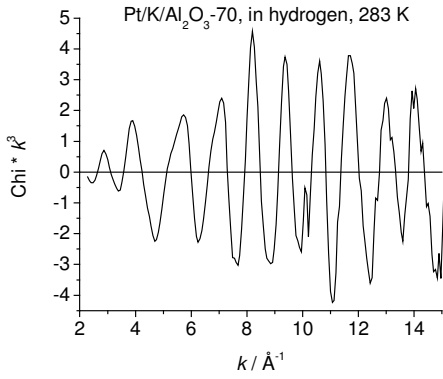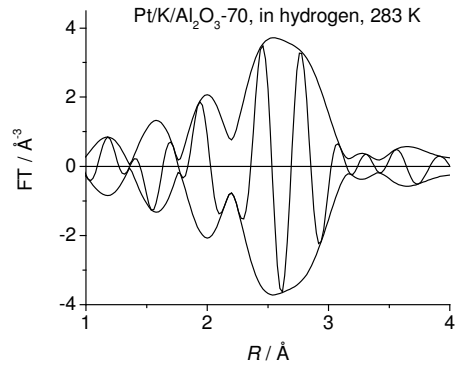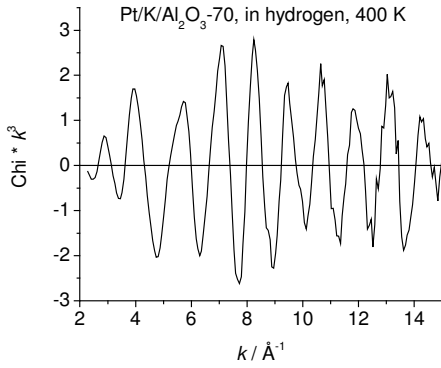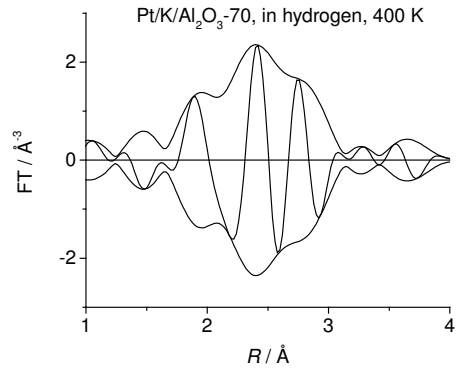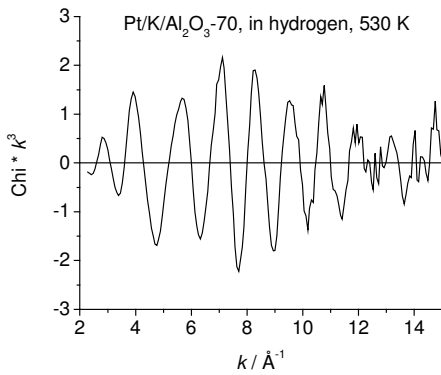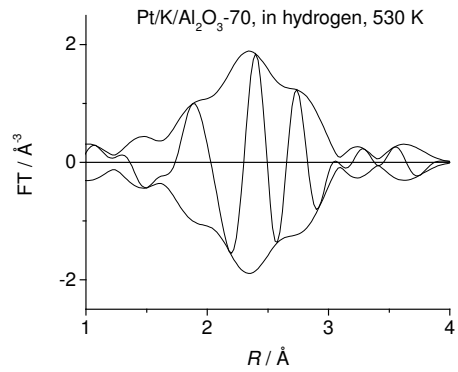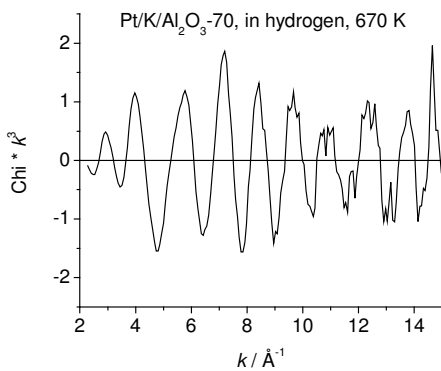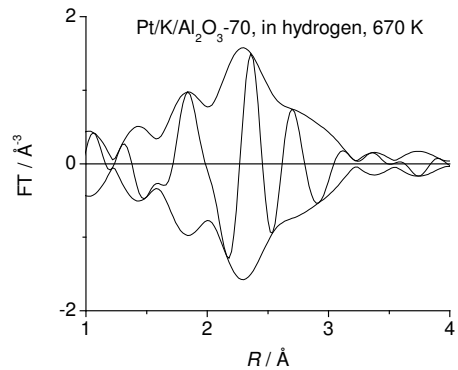

# Pt/Al<sub>2</sub>O<sub>3</sub>-57

$k^3$ -weighted Chi-data and  $k^3$ -weighted FT's ( $k = 3 - 12.5 \text{ \AA}^{-1}$ )

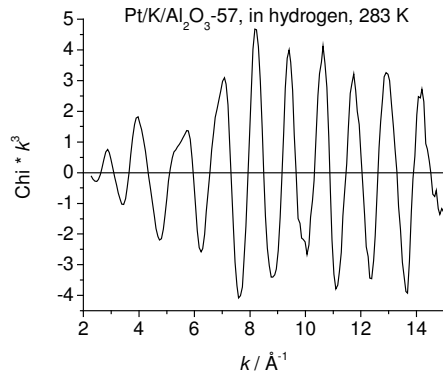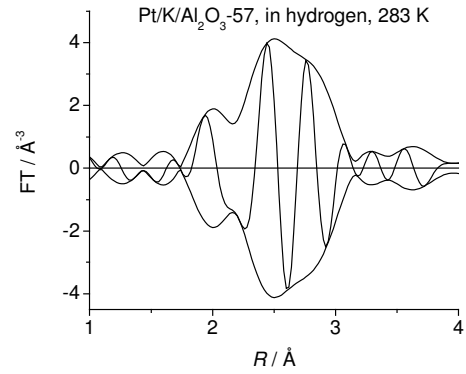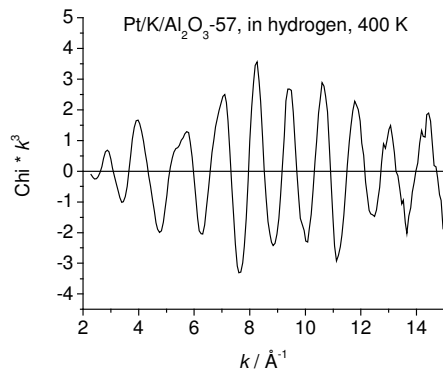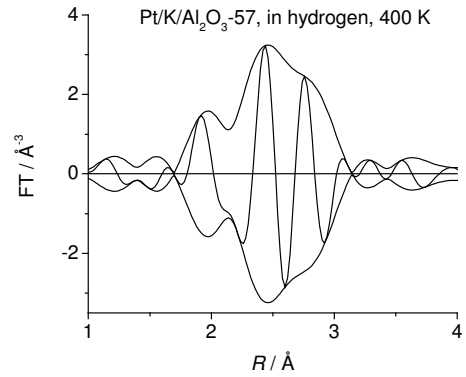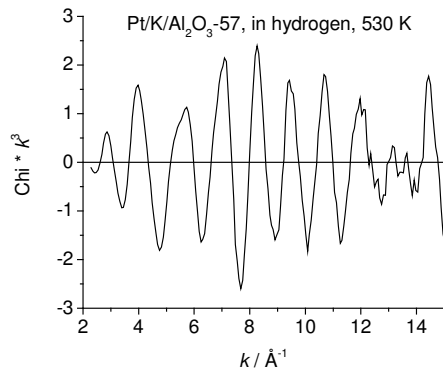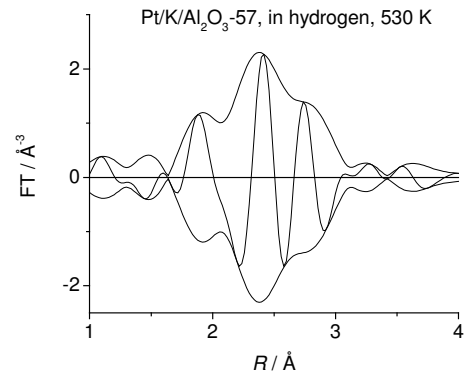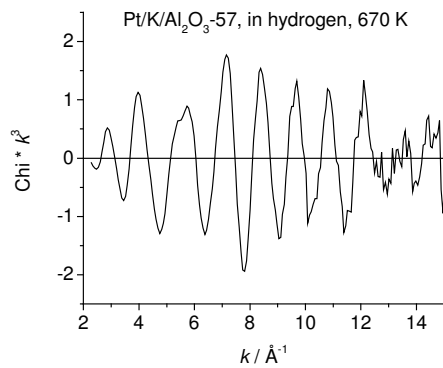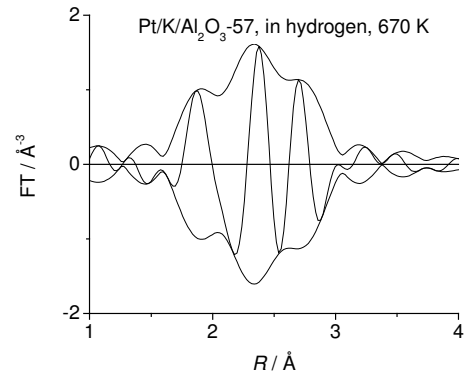

# Pt/Al<sub>2</sub>O<sub>3</sub>-18

$k^3$ -weighted Chi-data and  $k^3$ -weighted FT's ( $k = 3 - 12.5 \text{ \AA}^{-1}$ )

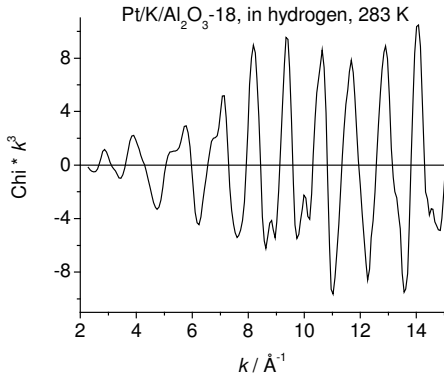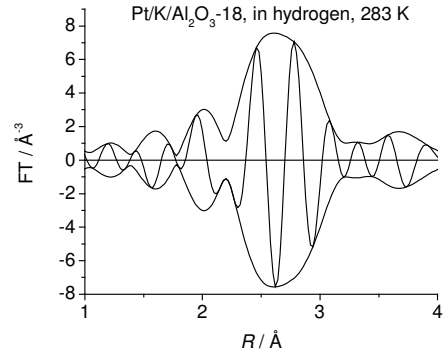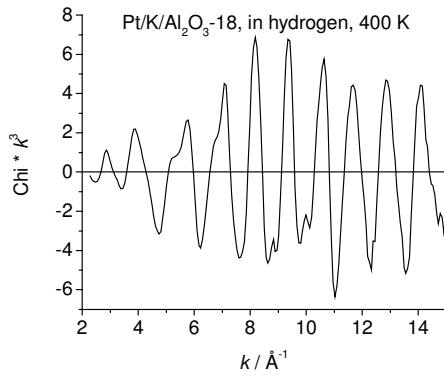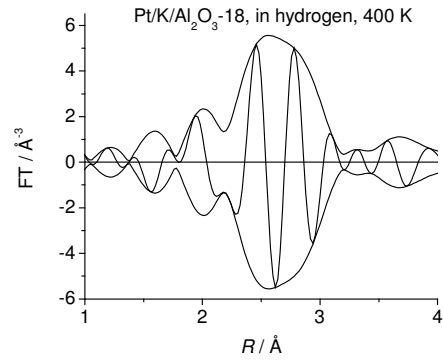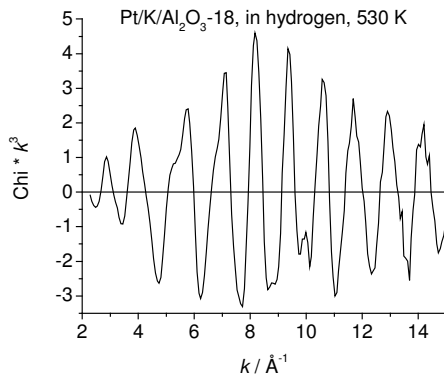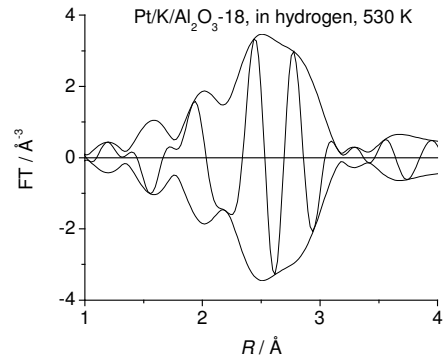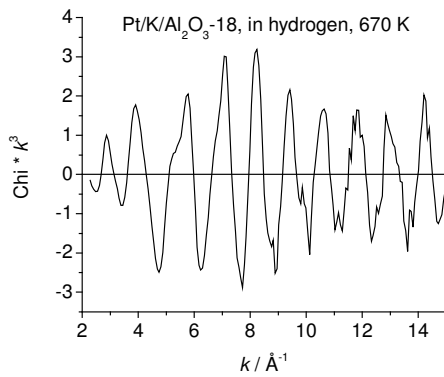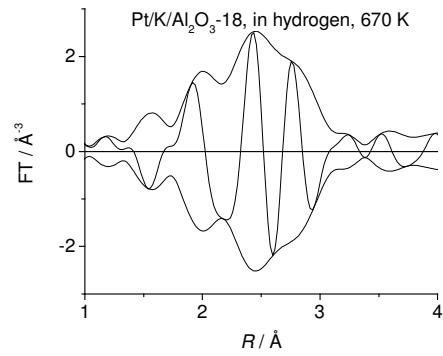

Supplement: b605248g.pdf [file b605248g.pdf]
